# Supplementary material for: The Fall and Rise of US Inequities in Premature Mortality: 1960–2002
Source: PubMed Central journal article supplement (PMC2253609; doi:10.1371/journal.pmed.0050046), 2008-02-26

ALASKA

# US counties by quintile of median household income, 1990

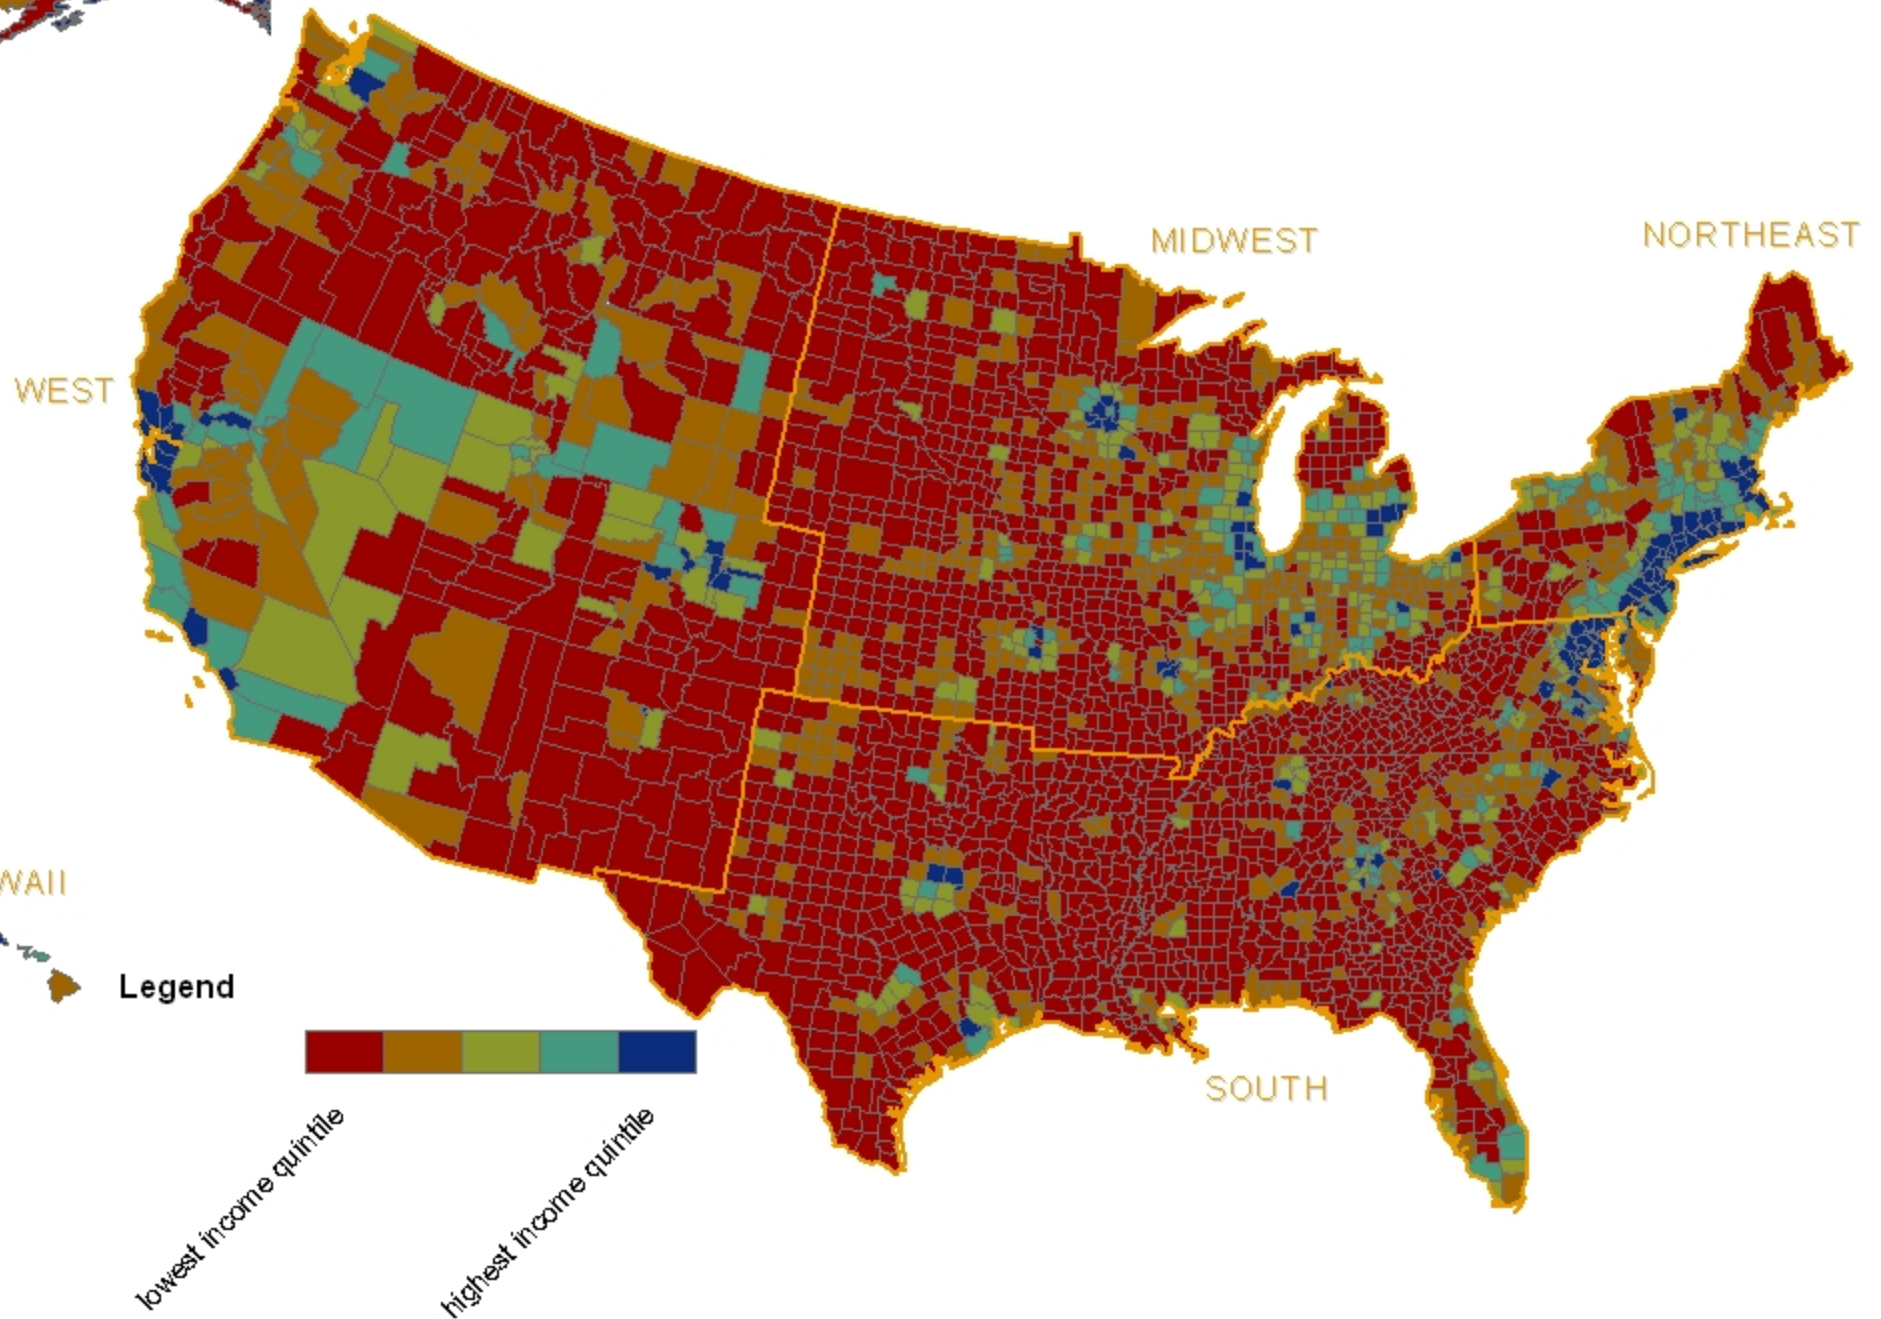

Supplement: pmed.0050046.sg004.pdf [file pmed.0050046.sg004.pdf]
